# Supplementary material
Source: publisher figshare collection journal article supplement (https://gsapubs.figshare.com/ndownloader/files/34171770)
Supplement: Supplementary file 1 [file 34171770]

## Sheet: Table S2
Supplementary Table S2. Whole-rock major- and trace-element compositions of the leucogranites and phengite gneisses. Unit is wt% for major elements and ppm for trace elements, respectively.
Sample No.	YK173-10a	YK1711-1a	YK192-1a	YK173-10b	YK1711-1b	YK192-1b
Lithology	Leucogranite			Phengite gneiss
SiO2	77.4403	76.8288	76.714	73.773	72.9781	72.519
TiO2	0.0750437	0.0930574	0.107	0.250053	0.319122	0.321
Al2O3	12.1935	12.4971	12.613	13.6286	13.5542	14.177
Fe2O3T	0.441964	0.520962	0.712	1.57277	2.26162	2.432
MnO	0.0601151	0.072378	0.066	0.0711245	0.106374	0.1
MgO	0.0226434	0.150546	0.211	0.574076	0.798231	0.926
CaO	0.436837	0.654193	0.7	1.40654	1.81836	1.077
Na2O	3.35032	2.85376	4.15	4.36491	3.72309	3.359
K2O	5.30666	5.67836	4.176	2.2831	2.75264	3.648
P2O5	0.0114219	0.0310191	0.027	0.0810819	0.0957366	0.098
LOI	0.17	0.3	0.366	1.14	1.01	1.457
Total	99.5088	99.6802	99.842	99.1452	100.114	100.114
Li	0.96318	1.50556	3.17451	17.8081	15.8246	24.0431
Be	1.43307	1.26087	1.84061	2.20997	2.90826	2.53861
Sc	6.92412	7.31782	6.38706	5.85383	7.1006	5.60211
V	3.89418	4.90408	5.04862	22.9321	35.8477	32.3258
Cr	3.45851	0.603573	2.36351	3.52734	3.64685	7.8206
Co	270.736	53.0455	0.544223	163.044	54.5695	3.82372
Ni	146.441	1.07003	1.36324	88.1616	3.35604	3.84613
Cu	6.32466	5.97772	4.49593	3.363	2.16794	1.27431
Zn	7.47347	8.03071	13.4743	36.8906	44.2352	43.7516
Ga	13.3336	12.6549	13.7933	16.5244	17.4916	17.145
Rb	110.676	112.541	91.8626	81.3892	103.122	120.807
Sr	195.05	249.104	255.589	496.832	339.094	270.829
Y	31.8356	33.836	28.6489	23.4778	25.6868	18.5175
Zr	80.3335	95.9684	84.0053	133.63	121.882	145.349
Nb	12.1198	18.1322	15.2916	11.237	13.473	12.1564
Sn	1.23164	1.1841	1.14829	1.22239	1.42205	1.10015
Cs	0.560075	0.651971	0.508633	1.38284	1.65312	1.48026
Ba	887.532	1264.93	1011.63	546.369	576.065	709.205
La	10.9509	12.8169	22.4198	27.3862	37.4001	23.6096
Ce	29.4668	36.7514	49.595	56.977	70.0742	46.6456
Pr	3.46555	4.17375	5.78381	6.06103	7.44272	5.27075
Nd	11.9205	15.1319	20.206	20.9384	25.5417	18.5587
Sm	3.8999	4.31099	4.8434	4.18803	4.56456	3.2621
Eu	0.135603	0.283931	0.323464	0.703685	0.788961	0.690156
Gd	3.73984	4.1481	3.95424	3.36748	3.88731	2.72875
Tb	0.717588	0.764603	0.733232	0.537895	0.612195	0.436204
Dy	4.78257	5.28882	4.69515	3.48113	3.84613	2.68648
Ho	1.01365	1.09733	0.97971	0.716421	0.812184	0.601787
Er	3.29238	3.42168	2.91242	2.26653	2.44979	2.05654
Tm	0.54759	0.562758	0.457744	0.353039	0.391271	0.402483
Yb	3.78304	4.02647	3.16726	2.22514	2.72204	3.1865
Lu	0.608288	0.612898	0.446394	0.346263	0.427167	0.513156
Hf	4.37089	4.5198	3.68231	3.98237	3.64591	4.09027
Ta	2.22295	1.90548	1.453	2.32	1.08216	0.836957
Tl	0.429014	0.464696	0.371278	0.295305	0.329008	0.388585
Pb	19.7342	19.8637	17.2336	22.0481	25.2959	13.9262
Th	13.4638	19.1835	14.7657	10.6688	14.1783	8.11808
U	3.60882	3.48886	3.2864	2.8848	3.63651	2.51919
ASI	1.01447	1.04549	1.00484	1.13457	1.11299	1.26634
ƩREE	78.3242	93.3916	120.518	129.548	160.96	110.649
Eu/Eu*	0.108553	0.205268	0.225966	0.572855	0.572605	0.707198
(La/Gd)N	2.54517	2.68567	4.92819	7.06879	8.36262	7.52046
(Dy/Yb)N	0.846127	0.879123	0.992159	1.04708	0.94568	0.564267
